# Supplementary material for: A pathogenic variant in the uncharacterized RNF212B gene results in severe aneuploidy male infertility and repeated IVF failure
Source: PubMed Central journal article supplement (PMC10133878; doi:10.1016/j.xhgg.2023.100189), 2023-03-31
Supplement: mmc1.pdf [file mmc1.pdf]

**HGGA, Volume 4**

**Supplemental information**

**A pathogenic variant in the uncharacterized  
*RNF212B* gene results in severe aneuploidy  
male infertility and repeated IVF failure**

**Moran Gershoni, Tslil Braun, Ron Hauser, Shimi Barda, Ofer Lehavi, Mira Malcov, Tsvia Frumkin, Yael Kalma, Shmuel Pietrokovski, Eli Arama, and Sandra E. Kleiman**

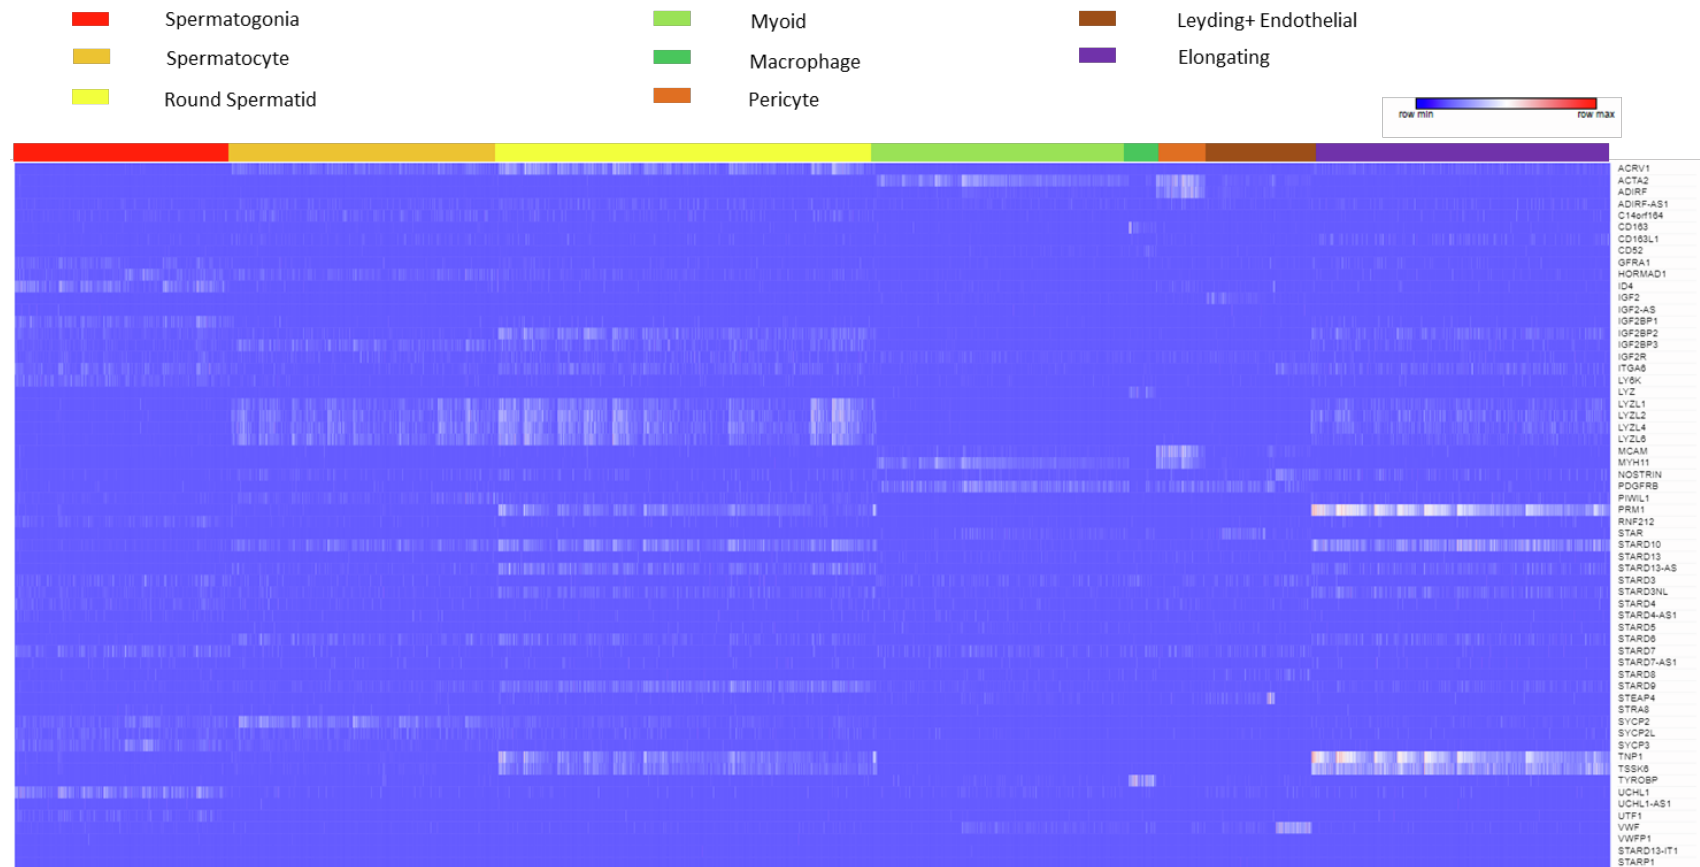

**Figure S1. Hierarchical clustering of testis single-cell RNA-seq obtained from<sup>1</sup> using spermatogenic cell markers (X axis, as detailed in the Materials and Methods section).**

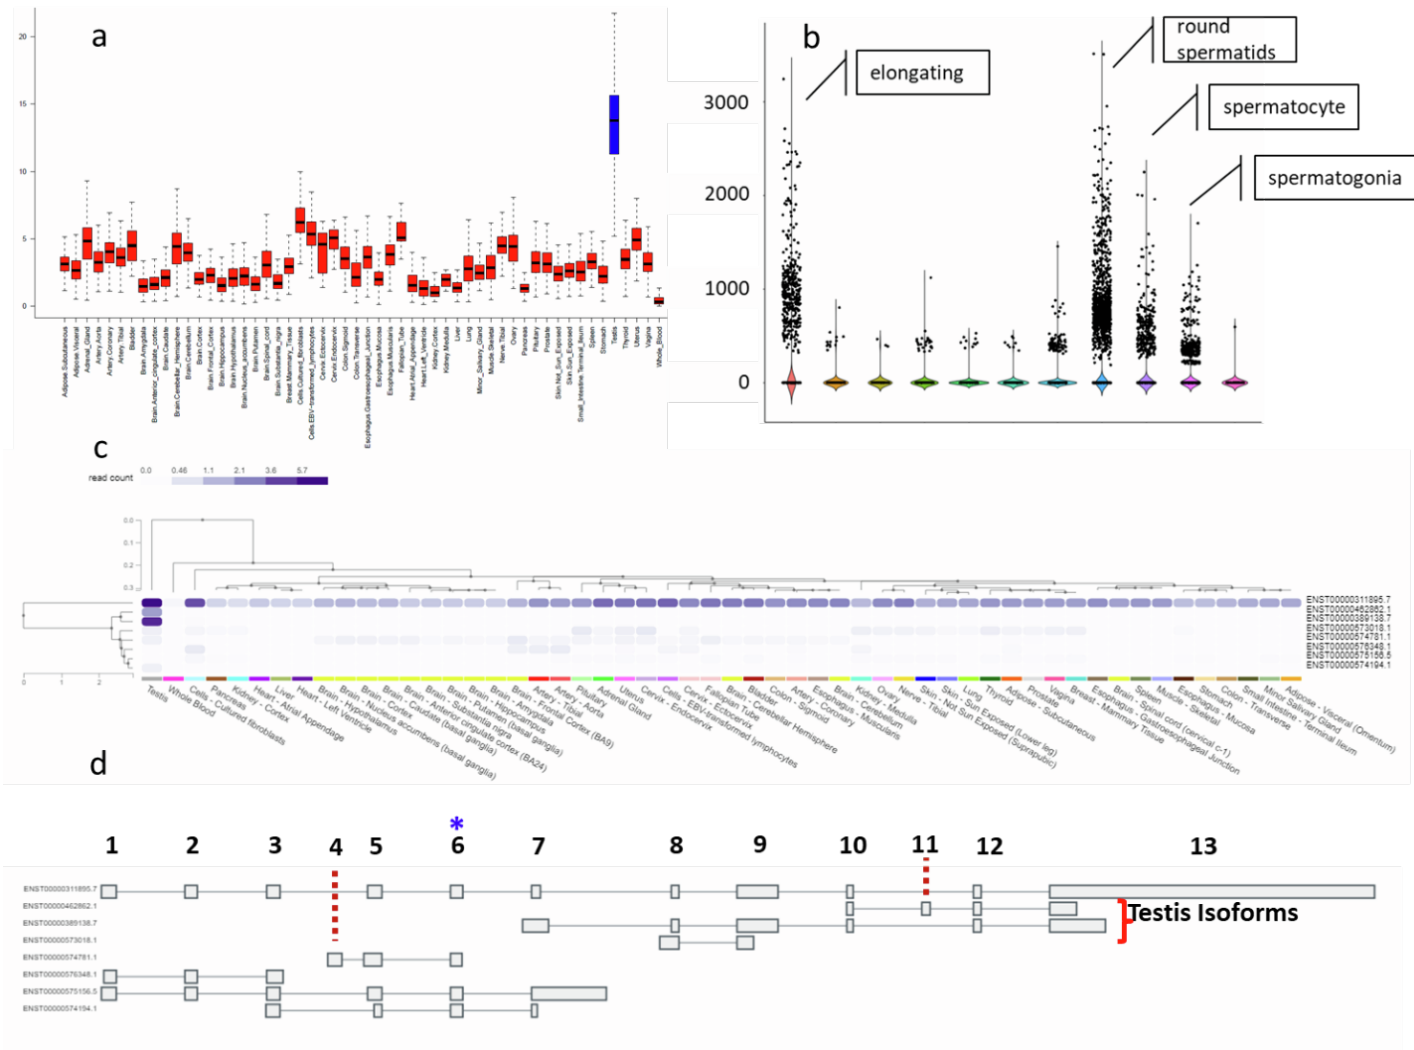

**Figure S2. ERCC4 expression analysis.** a) Expression pattern of ERCC4 across 53 human tissues obtained from GTEx<sup>20</sup>, blue bar denotes testis tissue. b) Testis single-cell RNA-seq analysis of ERCC4 shows increased expression levels in round spermatids and elongating cells. c) Expression of ERCC4 transcript isoforms shows two ERCC4 testis-specific transcripts. d) schematic structure of ERCC4 as inferred from the GTEx data shows that

ERCC4 testis-specific isoforms do not harbor the exon with the candidate variant. The Blue asterisk denotes the variant location. Dashed lines point to the exon number.

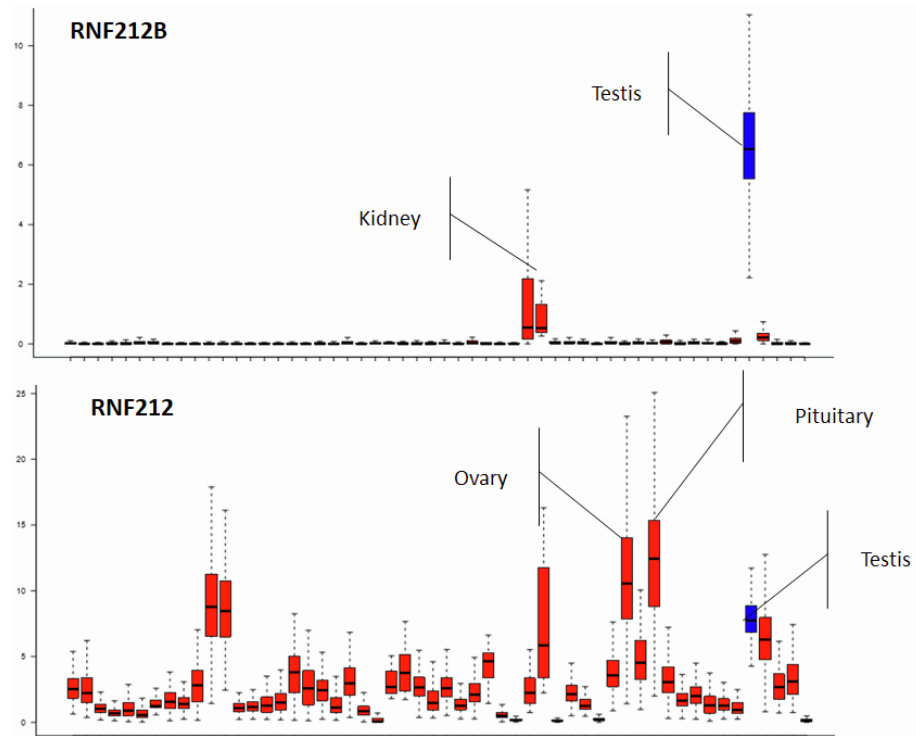

**Figure S3. RNF212B bulk RNA-seq expression analysis.** Expression of RNF212B and RNF212 in Transcript per million (TPM) values (Y-axis) across 53 human tissues (X-axis). Blue bars denote testis tissue. RNF212B shows almost testis-exclusive expression (with some expression in two kidney tissues), contrary to RNF212, which shows high expression in Ovary and several somatic tissues.

a

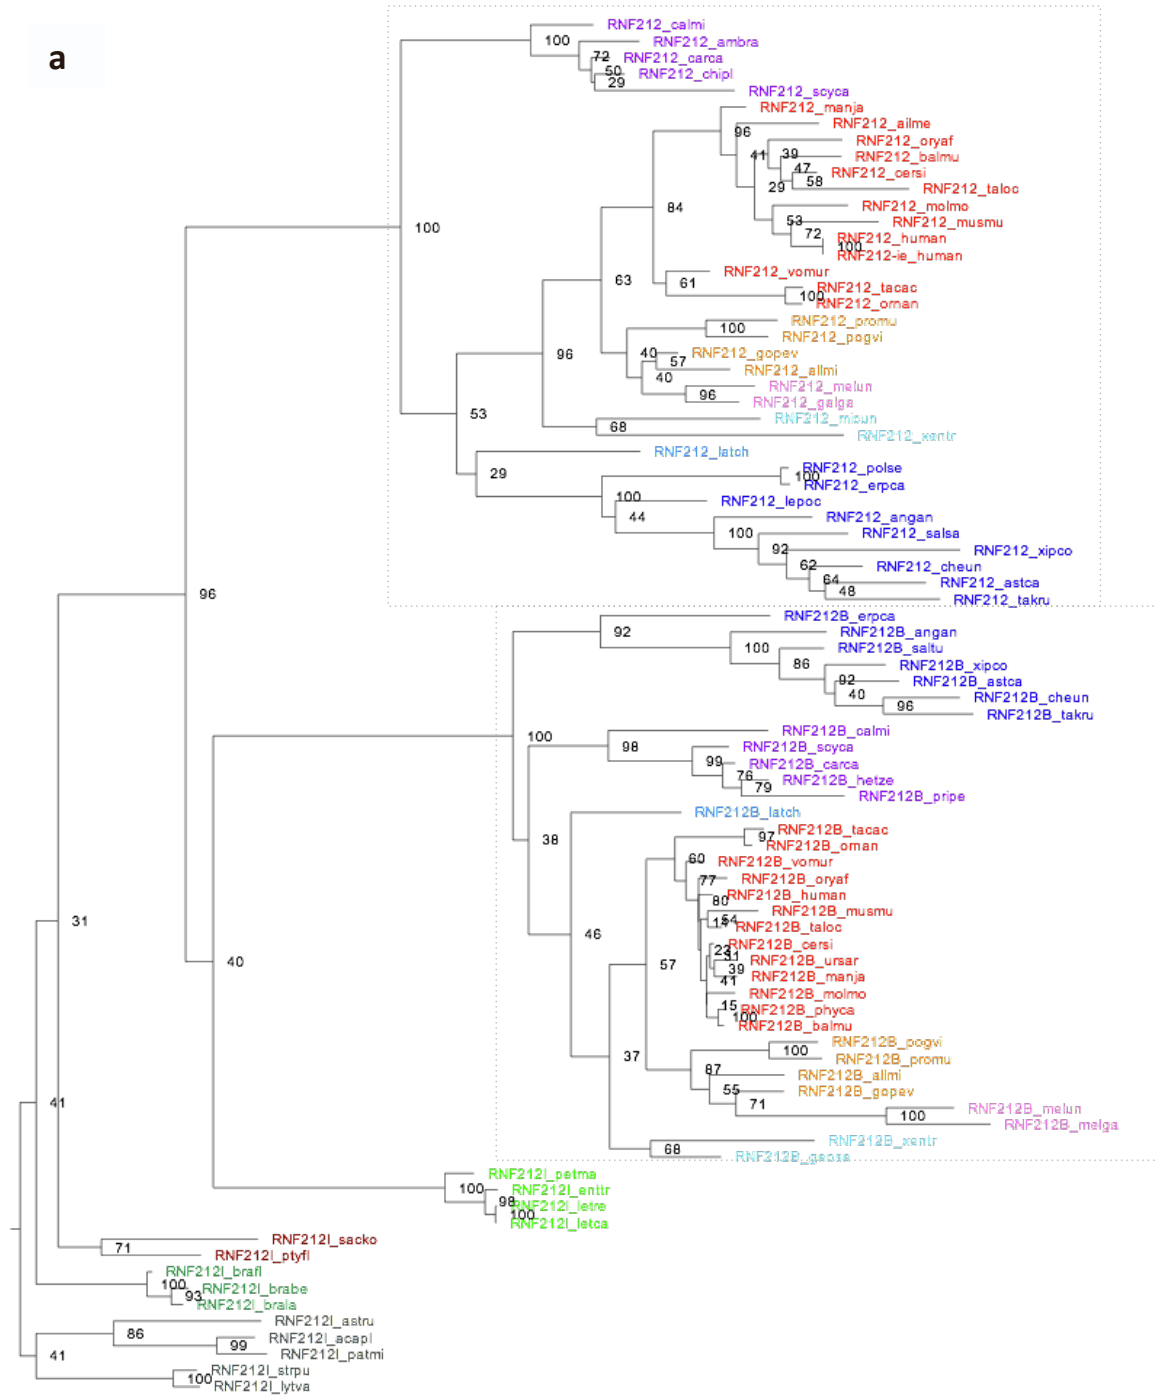

Jawed vertebrates RNF212

Jawed vertebrates RNF212B

- Mammals
- Reptiles
- Birds
- Amphibians
- Lobe-finned fish (coelacanth)
- Ray-finned fish
- Cartilaginous fish
- Lampreys
- Lancelets
- Hemichordates
- Echinoderms

b

|         |     |                                                                 |     |
|---------|-----|-----------------------------------------------------------------|-----|
| RNF212B | 2   | D--W-FHCNQCFRK-----DGAHFFVTSCGHI FCKKCV---TLE-----KCAV          | 38  |
| RNF212  | 3   | N--W-VFCNRCFQPPH-RT--SCFSLTNCGHVYCDACL GKGKKN-----ECLI          | 44  |
| Vilya   | 15  | SKLW-IHCNSCCALF-CDKKHTFFLLA-CHHVFECRCVKV----SAGRTPSDAPI FECST   | 67  |
| Nenya   | 2   | ---FRIHCNKCFRRR-NVEPTLI FHMTQCQHVL CASCLSES---S-TDK-----KCPL    | 46  |
| Narya   | 2   | ---FRVHCNKCFRHR-KTDP AVPFHLTQCRHVICGPCLGQS---S-LEK-----NCPL     | 46  |
|         |     |                                                                 |     |
| RNF212B | 39  | CGTACKHLALS DN LKPQEK MFFK-SPVETAL-QYFS-H---ISQVWSEFK-KQTDLLIAF | 91  |
| RNF212  | 45  | CKAPCRTVLLSKHTDADIQAFFM-SIDSLCK-KYSR-E---TSQILEFQE-KHRKLLAF     | 97  |
| Vilya   | 68  | CRRSVRGRQLTNSMPNHFKQLFHPEP-----F---TIGNDF---VETFQRGMHR-HFDKY    | 115 |
| Nenya   | 47  | CKRDLRAIPIDKNLPPNVAQYFE-DP-----LRF-QQLYRK---ISKFQ-ADQRASDNLG    | 95  |
| Narya   | 47  | CGQVLKAIQINRDMPTSVANYFA-DP-----LRF-QQIYRK---ISKFQ-ADQRASDNLG    | 95  |
|         |     |                                                                 |     |
| RNF212B | 92  | YKHRITKLETAMQEAQQALVSQ-----DK                                   | 115 |
| RNF212  | 98  | YREKISRLEESLRKSVLQIEQL-----QS                                   | 121 |
| Vilya   | 116 | KERKELEMDKLEKDI EVAKSVCQKRFL EAQ--                              | 145 |
| Nenya   | 96  | FYR---QMQEHEKNE SRLKGFCKME AQFNQ--                              | 122 |
| Narya   | 96  | FYR---QLQQLEQNKRL EGFCKME AQLNQ--                               | 122 |

**Figure S4. RNF212-like proteins from vertebrates, hemichordates, and echinoderms.** a) Dendrogram calculated from the RING zinc-finger sequence domain of representative proteins from species of various taxa, as denoted in the figure inset. Bootstrap values out of 100 are marked for each junction. The jawed vertebrate regions are marked and labeled. The Echinoderm cluster was used as an outgroup to root the tree. Note the congruence of the topology throughout the tree with established taxonomy of the different well-supported clusters. Sequence sources and descriptions are in Table S5. b) RING zinc-finger domains of Human RNF212 and RNF212B, and *Drosophila melanogaster* Vilya, Nenya, and Narya proteins. This domain is common in all RNF212-like protein family members.

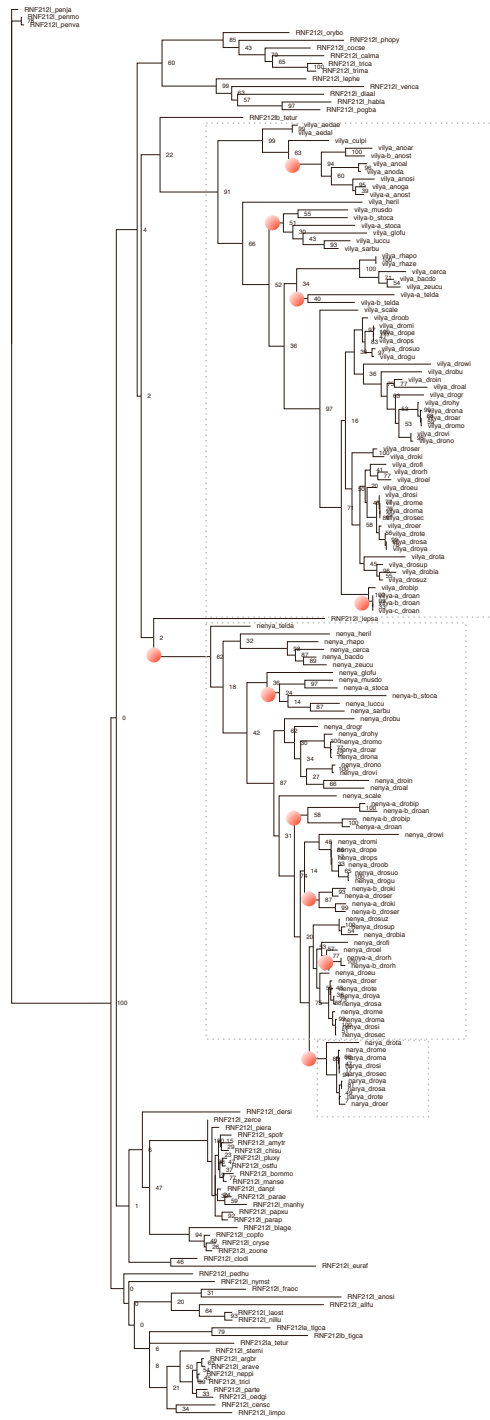

Vilya proteins

Nanya proteins

Narya proteins

**Figure S5. Arthropods' RNF212-like proteins dendrogram.** Regions of Vilya, Nanya, and Narya proteins are marked and labeled. Red spheres mark likely positions of gene duplications. Bootstrap values out of 100 are marked for each junction. Sequence sources and descriptions are in Supplementary Table 5.



- Mammals
- Reptiles
- Birds
- Amphibians
- Lobe-finned fish (coelacanth)
- Ray-finned fish
- Cartilaginous fish
- Lampreys
- Lancelets
- Tunicates
- Hemichordates
- Echinoderms
- Brachiopods
- Mollusks
- Arthropods
- Nematodes
- Segmented worms
- Cnidaria
- Ctenophores
- Sponges
- Choanoflagellates
- Fungi
- Protists

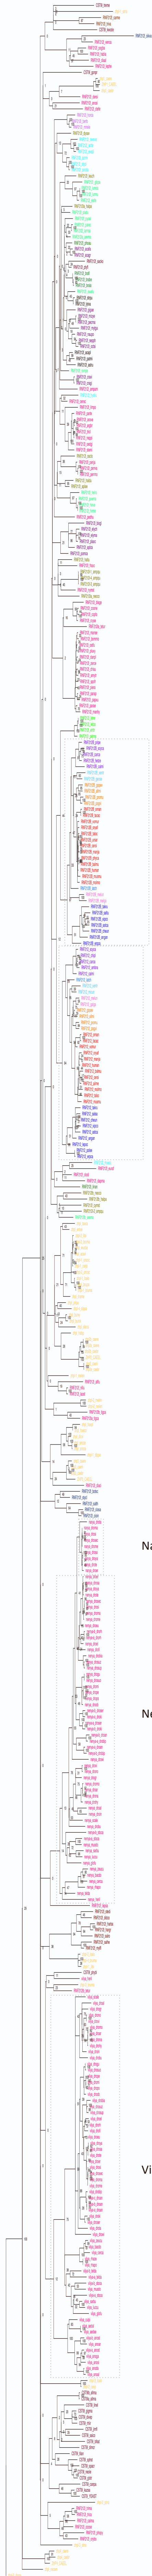

Jawed vertebrates RNF212B

Jawed vertebrates RNF212

Narya

Nenya

Vilya

**Figure S6. Sequence relation between RNF212-like proteins (appendix) .** Dendrogram calculated from the RING zinc-finger sequence domain (figure S4b of diverse proteins, colored by phylogenetic groups as shown in the inset). Bootstrap values out of 100 are marked for each junction. The jawed vertebrate regions, and arthropod Vilya, Nenya, and Narya-like proteins are marked and labeled. Sequence sources and descriptions are in Supplementary Table 5.

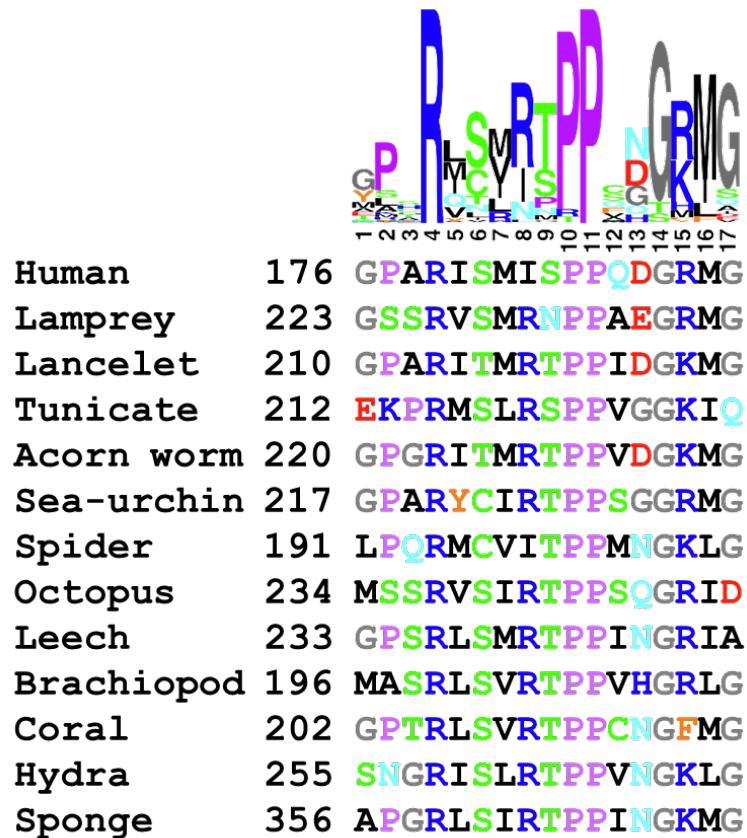

**Figure S7. Protein sequence motif present in RNF212 proteins of jawed vertebrates and other animals.** Top, sequence logo of the motif. Bottom, motif sequences and protein start coordinates from representative species: Human (accession NP\_001353848.1),

lamprey (*Petromyzon marinus*, XP\_032830699.1), lancelet (*Branchiostoma floridae*, XP\_035678696.1 ), tunicate (*Ciona intestinalis*, XP\_002131044.1), acorn worm (*Saccoglossus kowalevskii*, XP\_006816460.1), sea-urchin (*Strongylocentrotus purpuratus*, XP\_030831903.1), spider (*Nephila pilipes*, GFS75922.1, octopus (*Octopus sinensis*, XP\_029633755.1), leech (*Hirudo medicinalis*, MPNW01000810.1), brachiopod (*Lingula anatina*, XP\_013394848.1), coral (*Pocillopora damicornis*, XP\_027037663.1), hydra (*Hydra vulgaris*, XP\_012561882.1), sponge (*Amphimedon queenslandica*, XP\_019860695.1).

**Supplementary Table 1.** PCR primers, annealing temperature, product size, and fragments size after restriction treatment for detection of candidate mutations

| GENE    | Variant                | Objective                | Primers (5' -> 3')                                 | PCR            |                       | Restriction ^ |                    |                    |
|---------|------------------------|--------------------------|----------------------------------------------------|----------------|-----------------------|---------------|--------------------|--------------------|
|         |                        |                          |                                                    | Annealing (°c) | Product size (bp)     | Enzyme        | Normal allele (bp) | Mutant allele (bp) |
| RNF212B | Exon8:c.C448T:p.R150X  | PCR, sequencing and RFLP | F- GTTGGAGAGCAATGGGTTTT<br>R- GGCCAATTTGTTGTACATGG | 60             | 399                   | Taq I         | 208+235            | 399                |
|         |                        | Rt-PCR                   | F- CTTCACCGGCTTCAACTCAT<br>R- GCAGGACTGGTAGCTGGAAA | 64             | cDNA:182<br>gDNA:1730 |               |                    |                    |
| ERCC4   | exon6:c.A1062C:p.K354N | PCR and sequencing       | F- GGAAGACAGGATGACAGCCA<br>R- ACACACTTTTCACATGGCCA | 60             | 341                   |               |                    |                    |
|         |                        | RFLP                     | mF- TTCCAGATGCCAAAATGAGTAAGA                       | 60             | 170                   | MBO II        | 34+36+100          | 136+34             |
| VCX3B   | exon3:c.C385G:p.Q129E  | PCR and sequencing       | F- AAAGGGGCTGCGACAAAGAT<br>R- ATAGGGGAGTACTTGGCCGT | 62             | 605+485               |               |                    |                    |

^After restriction, PCR products were analyzed on agarose gel (3 %).

Both enzymes were from NEB (USA).

F, forward primer; R-reverse primer; mF mismatch forward primer; bp, base pairs.

**Supplementary Table 2.** CNVs analysis around RNF212B R150X PV

| Location at chromosome 14 |             |          |          |          |          |          |          |          |          |          |          |          |          |
|---------------------------|-------------|----------|----------|----------|----------|----------|----------|----------|----------|----------|----------|----------|----------|
| Men tested                | 21769717    | 22110223 | 22507947 | 22687399 | 22781471 | 23026660 | 23069623 | 23295947 | 23731887 | 23904379 | 24042993 | 24339720 | 24397229 |
|                           | RNF212B-mut |          |          |          |          |          |          |          |          |          |          |          |          |
| P-1                       | 363/363     | 270/270  | 286/286  | 313/313  | 426/426  | 327/327  | 275/275  | 225/225  |          | 266/266  | 251/251  | 323/323  | 233/233  |
| P-2                       | 363/363     | 270/270  | 286/286  | 313/313  | 426/426  | 327/327  | 275/275  | 225/225  |          | 266/266  | 251/251  | 323/323  | 233/233  |
| Fertile brother           | 363/366     | 270/270  | 286/292  | 313/313  | 426/428  | 327/333  | 269/275  | 225/229  |          | 266/266  | 251/251  | 323/323  | 233/243  |
| PS-1                      | 363/366     | 270/276  | 280/284  | 313/326  | 428/428  | 327/327  | 275/275  | 225/225  |          | 266/278  | 251/251  | 323/323  | 241/249  |

**Supplementary Table 3.** Likely functional candidate mutations in patients P-1 and P-2

| Chr <sup>1</sup> | Start <sup>2</sup> | Ref <sup>3</sup> | Alt <sup>4</sup> | GENE <sup>5</sup> | FUNC <sup>6</sup> | SIFT <sup>7</sup> | Mut. Taster <sup>8</sup> | gnomAD exome <sup>9</sup> | gnomAD genome <sup>10</sup> | Testis r-score <sup>11</sup> |
|------------------|--------------------|------------------|------------------|-------------------|-------------------|-------------------|--------------------------|---------------------------|-----------------------------|------------------------------|
| 14               | 23731887           | C                | T                | RNF212B           | stop              | .                 | A                        | 0.0002                    | .                           | 0.99                         |
| 16               | 14026102           | A                | C                | ERCC4             | NS                | D                 | D                        | .                         | .                           | 0.75                         |
| 20               | 47614885           | G                | A                | ARFGEF2           | NS                | D                 | D                        | 0.001                     | 0.0003                      | 0.21                         |
| 2                | 1.49E+08           | G                | A                | MBD5              | NS                | T                 | D                        | 0.0023                    | 0.0017                      | 0.11                         |
| 2                | 1.61E+08           | C                | T                | ITGB6             | NS                | D                 | D                        | 0.0081                    | 0.0035                      | 0.09                         |
| 20               | 33511162           | G                | A                | ACSS2             | NS                | T                 | D                        | 0.0006                    | 0.0002                      | 0                            |
| 20               | 44470575           | G                | A                | ACOT8             | NS                | D                 | D                        | 0.005                     | 0.0044                      | 0                            |
| 20               | 40049450           | T                | A                | CHD6              | NS                | D                 | N                        | 0.0052                    | 0.0029                      | -0.009                       |
| 1                | 1.86E+08           | G                | A                | HMCN1             | NS                | T                 | D                        | 0.0009                    | 0.0002                      | -0.02                        |
| 1                | 1.86E+08           | C                | T                | HMCN1             | NS                | D                 | D                        | 0.0009                    | 0.0001                      | -0.01                        |
| 6                | 90121647           | -                | TCC              | RRAGD             | INS               |                   |                          |                           |                             | -0.02                        |
| 20               | 25060143           | G                | C                | VSX1              | NS                | T                 | D                        | 0.0034                    | 0.0029                      | -0.02                        |
| 2                | 1.61E+08           | A                | G                | LY75              | NS                | D                 | N                        | 3.25E-05                  | .                           | -0.04                        |
| 2                | 1.67E+08           | C                | T                | SCN7A             | NS                | D                 | N                        | 4.08E-05                  | 6.46E-05                    | -0.04                        |
| X                | 1.14E+08           | G                | A                | LRCH2             | NS                | D                 | D                        | 0.0003                    | 0.0001                      | -0.06                        |

1-2.Chromosomal position.

3. Reference allele (hg19).

4. Alternative allele.

5. HGNC gene symbol.

6. Transcriptional consequence. NS=non synonymous; INS=insertion; stop= stop-gain

7-8. functional impact prediction by SIFT<sup>7</sup> and Mutation tester<sup>8</sup>. D= deleterious; A= affect; T= tolerant; N= neutral

9-10. minor allele frequencies obtained from the gnomAD<sup>45</sup>

11. The Pearson correlation co-efficiency score for testis-specific expression (see material and method).

**Supplementary Table 4.** FISH findings of blastomeres after fertilization with P-1 sperm cells

| <b>Embryo number</b> | <b>Stage</b>  | <b>Blastomeres tested</b> | <b>Fish findings</b> |
|----------------------|---------------|---------------------------|----------------------|
| 1                    | I             | 2                         | t21, m22             |
| 2                    | I             | 1                         | m13, m18, m22        |
| 3                    | I             | 2                         | m13, m22             |
| 4                    | I-II          | 2                         | m16, m18, m22, n13   |
| 5                    | I             | 1                         | t13                  |
| 6                    | I arrest      | 2                         | m16, m18 ,n22        |
| 7                    | II-III arrest | 1                         | haploid cell         |

A sampling of embryos was performed on day 3. The assessment was for chromosomes 13, 16, 18, 21 and 22

Stage I: <10% fragmentation and similar cell sizes. Stage II: 10-20% fragmentation, and cells were not all of the similar sizes.

t: trisomy

m: monosomy

n: nullisomy
